# Supplementary material for: Navigational strategies underlying temporal phototaxis in Drosophila larvae
Source: Oxford University Press journal article supplement (doi:10.1242/jeb.242428), 2021-05-06
Supplement: jeb242428supp.pdf [file jeb242428supp.pdf]

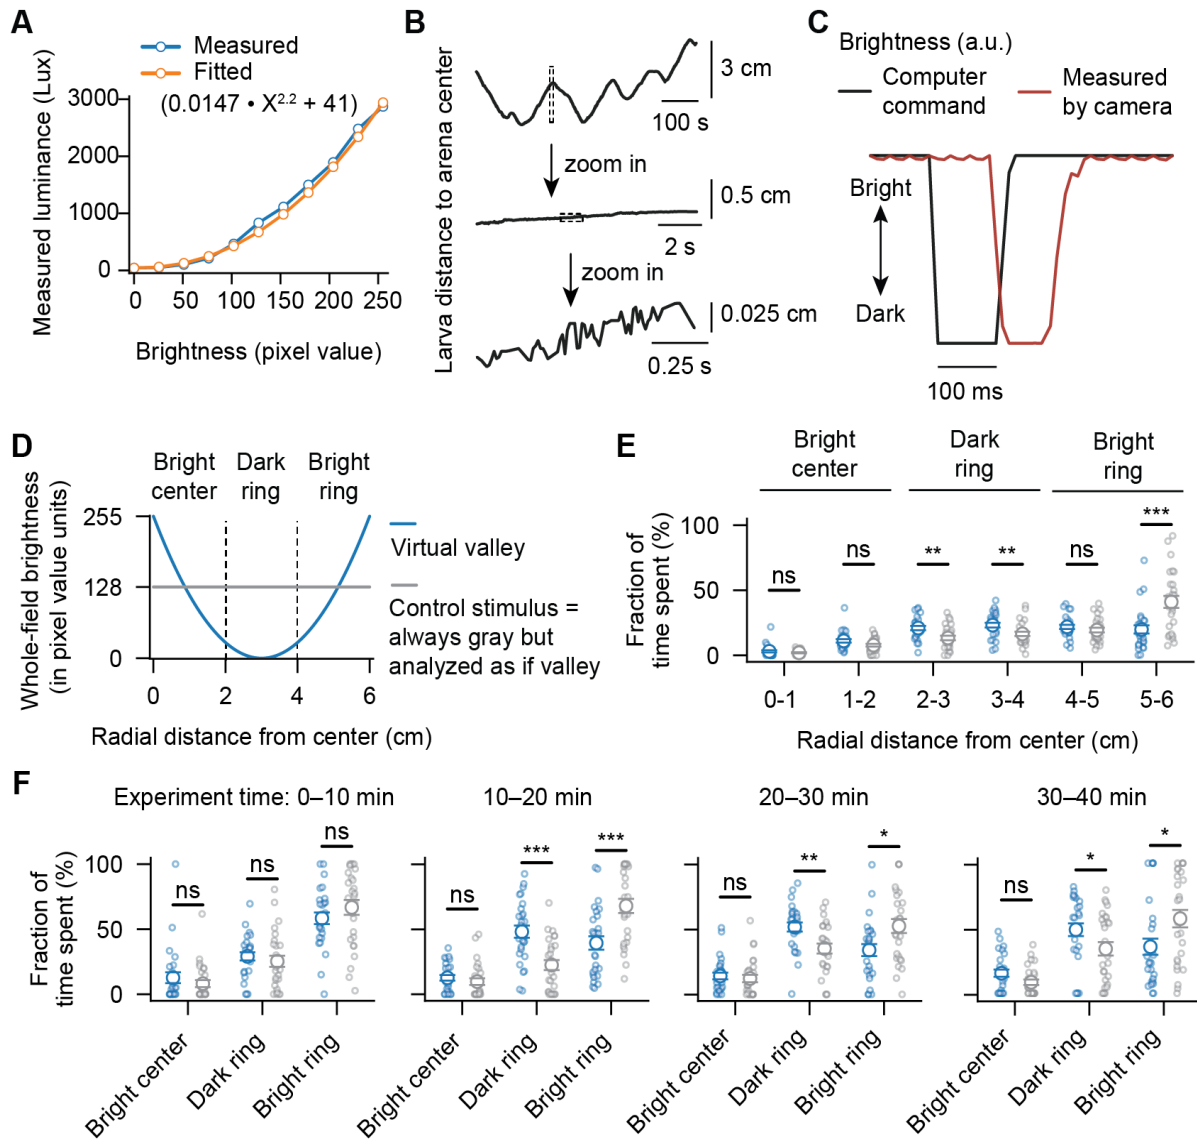

**Figure S1. Performance of the closed-loop behavior setup and detailed behavior quantification. (A)**

Luminance as a function of computer pixel brightness, measured with a professional light meter and fitting results. As it is unclear how the larval visual system processes contrast, we did not attempt to linearize this curve. **(B)** Example raw tracking data, displayed in form of the radial distance to the center of the arena. Changes in the slope of this curve indicate events where the larva makes a turn. When zooming into this trace, it becomes visible that tracking noise is very small, in the order of  $\pm 0.025$  cm (within a period of 0.25 s). Given our position-dependent brightness function (**Fig. 1B**), this would lead to a maximum pixel brightness fluctuation of as small as  $\pm 3$  over the same short time period. **(C)** Measurement of the closed-loop delay of the system: We remove the infrared filters from the camera and directly measure the luminance coming from the projector. The projector starts with a high level of brightness. After a few seconds, it rapidly switches to a dark state. Whenever the camera detects this event, we automatically set

the brightness level back to a bright state again. The time of darkness is the full closed-loop delay of the system. **(D)** Luminance profile used for the “Valley” stimulus (same panel as in **Fig. 1B**). **(E)** Fraction of time larvae spend in the different regions for finer radial bin size (left to right:  $p = 0.264$ ,  $p = 0.060$ ,  $p = 0.002$ ,  $p = 0.009$ ,  $p = 0.310$ ,  $p < 0.001$ ; two-sided t-tests). **(F)** Fraction of time spent in the different regions, analyzed in 10 min time bins (left to right:  $p = 0.360$ ,  $p = 0.481$ ,  $p = 0.256$  for first period;  $p = 0.053$ ,  $p < 0.001$ ,  $p < 0.001$  for second period;  $p = 0.616$ ,  $p = 0.002$ ,  $p = 0.011$  for third period;  $p = 0.054$ ,  $p = 0.044$ ,  $p = 0.022$  for third period; two-sided t-tests). Error bars represent mean  $\pm$  SEM. Blue dots indicate “Valley” stimulus larvae. Gray dots indicate “Constant” stimulus larvae.  $N = 27$  larvae for both groups. Open circles represent individual animals.

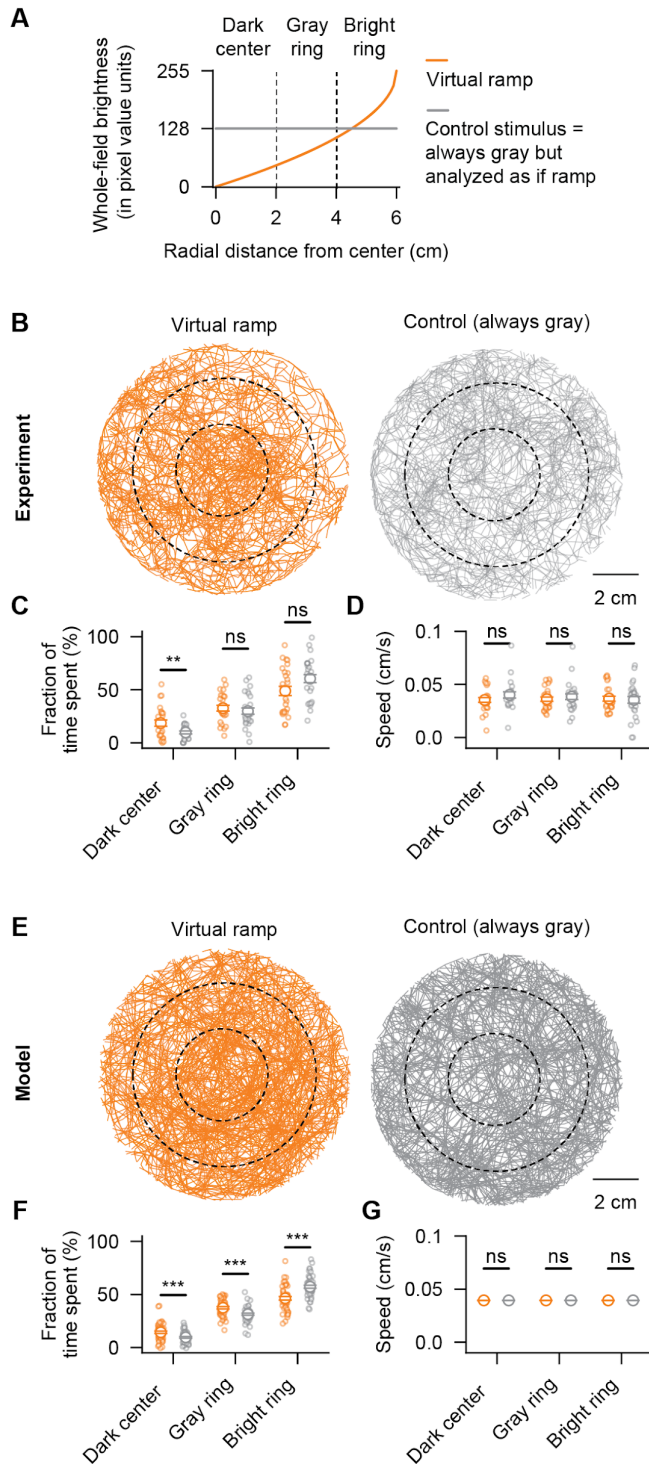

**Figure S2. Temporal phototaxis in the alternative “Ramp” stimulus configuration (experimental data and modeling).**

(A) Whole-field brightness as a function of larval position for the “Ramp” stimulus and the “Control” stimulus. (B) Raw trajectories. Dashed circles delineate the “Dark” center, the “Gray” ring, and the “Bright” ring. (C) Fraction of time spent in each region (left to right:  $p = 0.009$ ,  $p = 0.484$ ,  $p = 0.051$ ; two-sided t-tests). (D) Crawling speed in each region (left to right:  $p = 0.200$ ,  $p = 0.479$ ,  $p = 0.770$ ; two-sided t-tests).  $N = 26$  and  $N = 27$  larvae for the “Ramp” stimulus and the “Constant” stimulus, respectively. Open circles represent individual animals. (E–G) Same as in (B–D) but for model simulations. (F,G) left to right:  $p < 0.001$ ,  $p < 0.001$ ,  $p < 0.001$  in (F) and  $p = 0.296$ ,  $p = 0.677$ ,  $p = 0.213$  in (G).  $N = 50$  simulated larvae in both groups in E–G. Model parameters are the same as used in Fig. 3B–I. Error bars represent mean  $\pm$  SEM. Orange dots and lines indicate “Ramp” stimulus larvae; Gray dots and lines indicate “Constant” stimulus larvae.

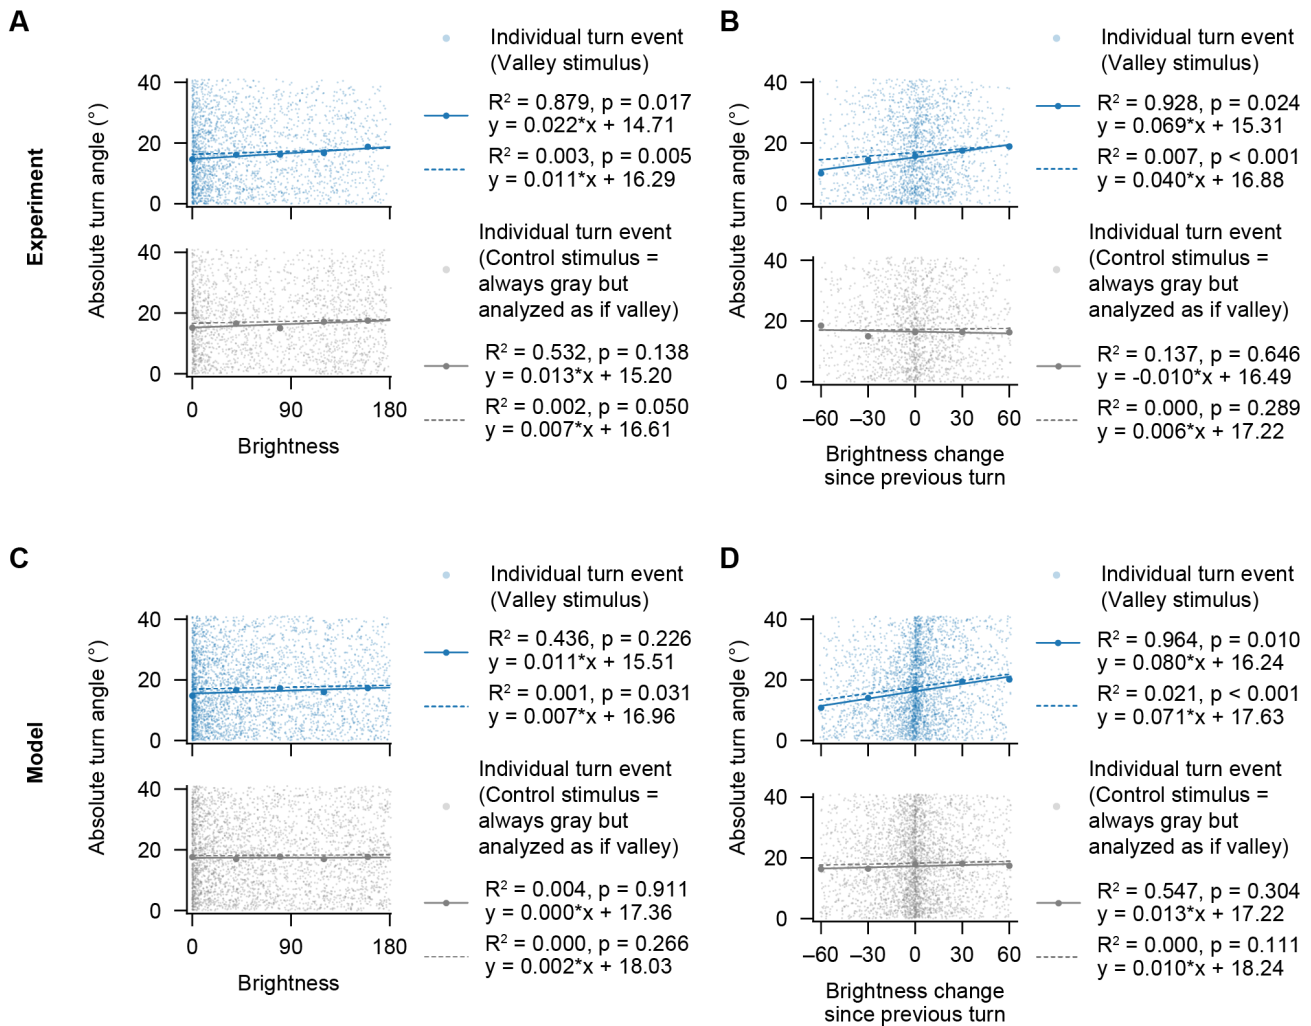

**Figure S3. Regression analysis on individual turn events (experimental data and modeling).** (A,B) Absolute turn angle as a function of instantaneous brightness (A) and as a function of brightness change since the previous turn (B) for “Valley” stimulus larvae (blue) and “Constant” stimulus larvae (gray). Small dots represent individual turns ( $n = 3153$  and  $n = 2981$  events, respectively, from  $N = 27$  larvae for each group). Bigger filled dots are binned data. Regression analysis was performed on binned data (solid lines) as well as on raw data points (dashed lines). (C,D) Same analysis as in (A,B) but for model simulations. P values are based on a bootstrapping approach by repeating the regression analysis 1000 times for shuffled raw data and then comparing the distribution of  $R^2$  values to the one from the original dataset.

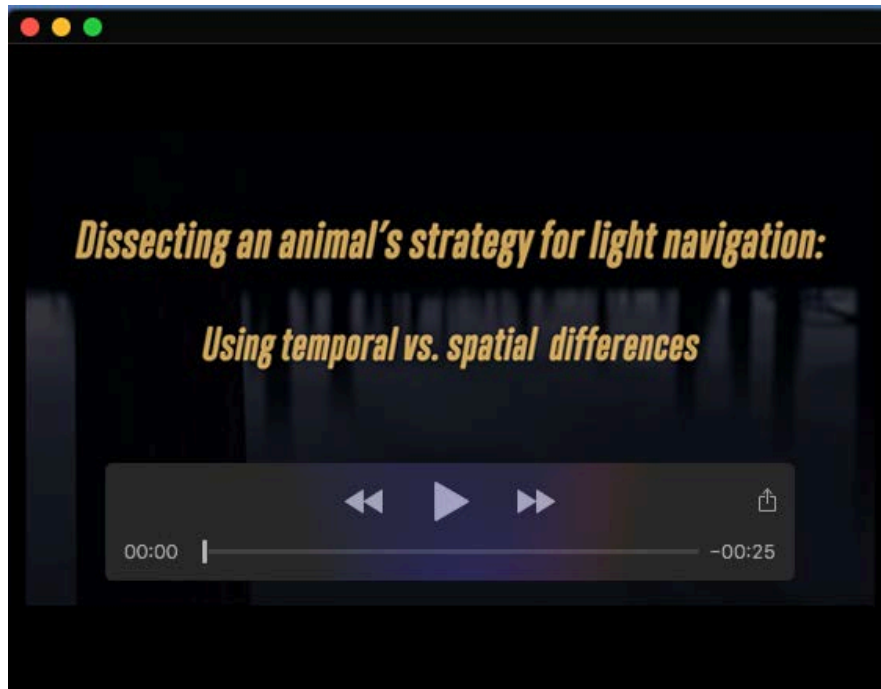

## Movie 1

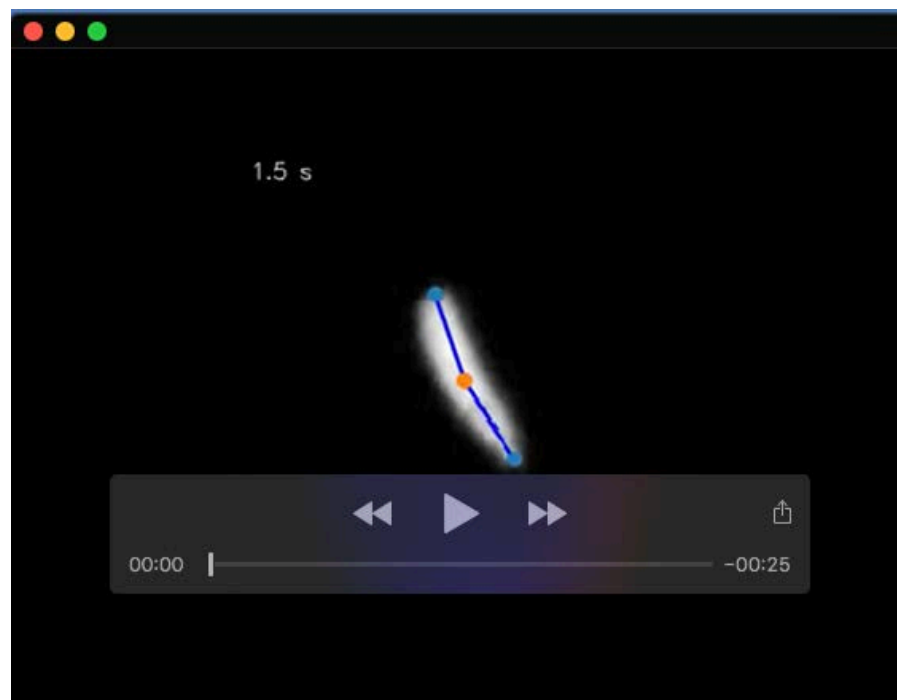

## Movie 2
